# Supplementary material for: Carbamazepine on a carbamazepine monolayer forms unique 1D supramolecular assemblies
Source: Royal Society of Chemistry journal article supplement (doi:10.1039/c1cc13590b), 2011-01-01
Supplement: c1cc13590b.pdf [file c1cc13590b.pdf]

# Towards a molecule-by-molecule understanding of crystal formation on heteronulcei: Molecular-scale studies of Carbamazepine on Gold

Erin V. Iski, **Error! Reference source not found.**, **Error! Reference source not found.**, E. Charles H. Sykes and Andrew J. Urquhart\*

## Supplementary Information

### Experimental Details

The sample preparation and STM imaging were conducted in a LT UHV Omicron Nanotechnology system with a base pressure  $< 5 \times 10^{-11}$  mbar. The Au(111) single crystal (MaTeck) was cleaned prior to CBZ deposition by cycles of Ar<sup>+</sup> sputtering (1.0 keV/18  $\mu$ A) followed by thermal anneals to 1,000 K. The cleanliness of the metal surface was verified by STM imaging. The CBZ sample vial was heated to  $\sim 413$  K, and the molecules were dosed onto the cold surface *via* sublimation into the STM chamber through a heated gas line and precision leak valve. The molecules were deposited on the samples through a collimated molecular doser. Due to the difficulty in achieving a multi-layer on the surface using the conventional dosing procedure, the cold sample ( $\sim 78$  K) was held in place directly in front of the molecular doser for 2 mins at  $1 \times 10^{-7}$  mbar. After dosing, the substrate was annealed to various temperatures so as to modulate coverage and provide thermal energy for molecular ordering to occur. The 160 K anneal was achieved by placing the sample in the room temperature carousel for 5 minutes, while the 220 K anneal was for 10 minutes. Topographic STM imaging was operated under the constant-current mode with the bias applied to the sample. The substrates were kept at 78 K during all STM imaging. All images were recorded with cut Pt/Ir wire tips (80/20, 0.25 mm diameter).

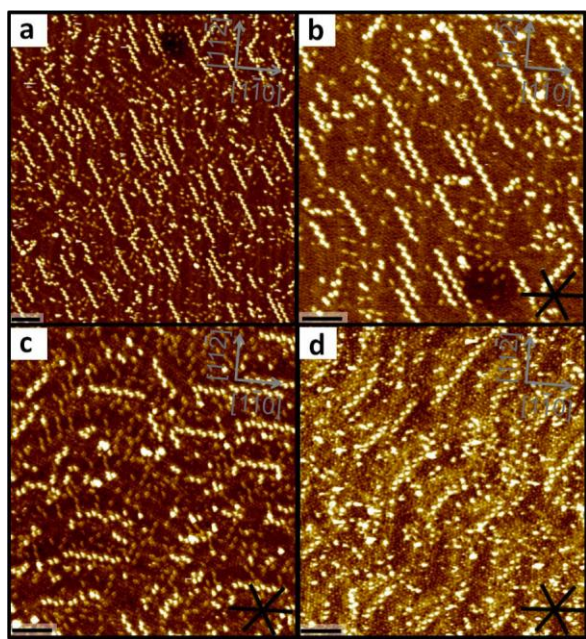

**Fig. S1** STM images of CBZ catemeric chains. a) Large-scale STM image showing the formation of ordered chains within the second layer of CBZ on Au(111).  $I = 35$  pA,  $V = -500$  mV, scale bar = 10 nm. b) Smaller-scale STM image indicating the alignment of the chains with the close-packed directions of the substrate (three black lines in each small scale image).  $I = 25$  pA,  $V = -500$  mV, scale bar = 7 nm. c and d) Additional small-scale images indicating how the chains orient in three different directions according to the three-fold symmetry of the underlying atomic lattice. c:  $I = 35$  pA,  $V = -700$  mV, scale bar = 7 nm. d:  $I = 50$  pA,  $V = -800$  mV, scale bar = 7 nm. Gold substrate crystallographic directions shown in grey.

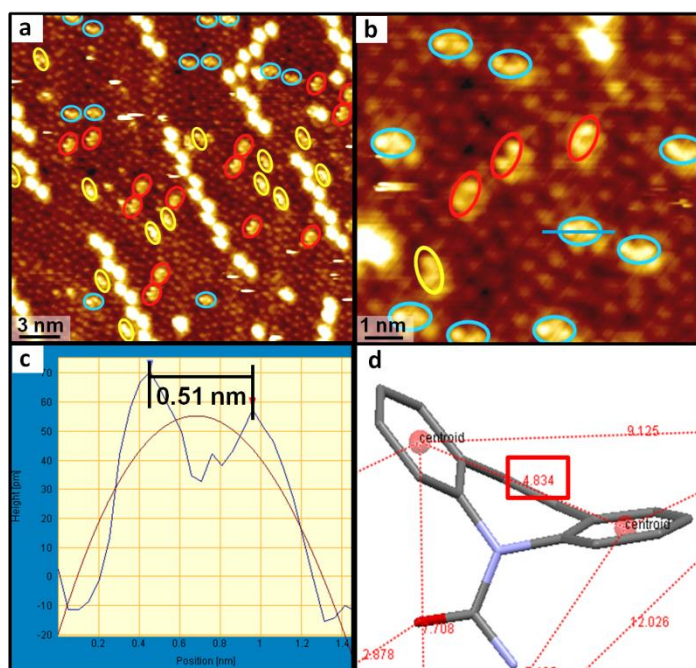

**Fig. S2** Orientations of individual second layer molecules not included in the catemer chains. a) The three preferred orientations of the molecules are indicated with coloured ovals.  $I = 25$  pA,  $V = -500$  mV, scale bar = 3 nm. b) A zoomed-in STM image showing the intramolecular resolution of the isolated second layer molecules.  $I = 25$  pA,  $V = -500$  mV, scale bar = 1 nm. c) A line scan of the blue line over the molecule in b indicates that the distance between the two lobes in the second layer CBZ molecule is  $\sim 0.5$  nm. d) The distance from the line scan is very close to that of the distance between the two aromatic rings of a single CBZ molecule as shown with a stick model of the molecule, which shows a theorized distance of 0.48 nm between the aromatic rings (boxed in red).

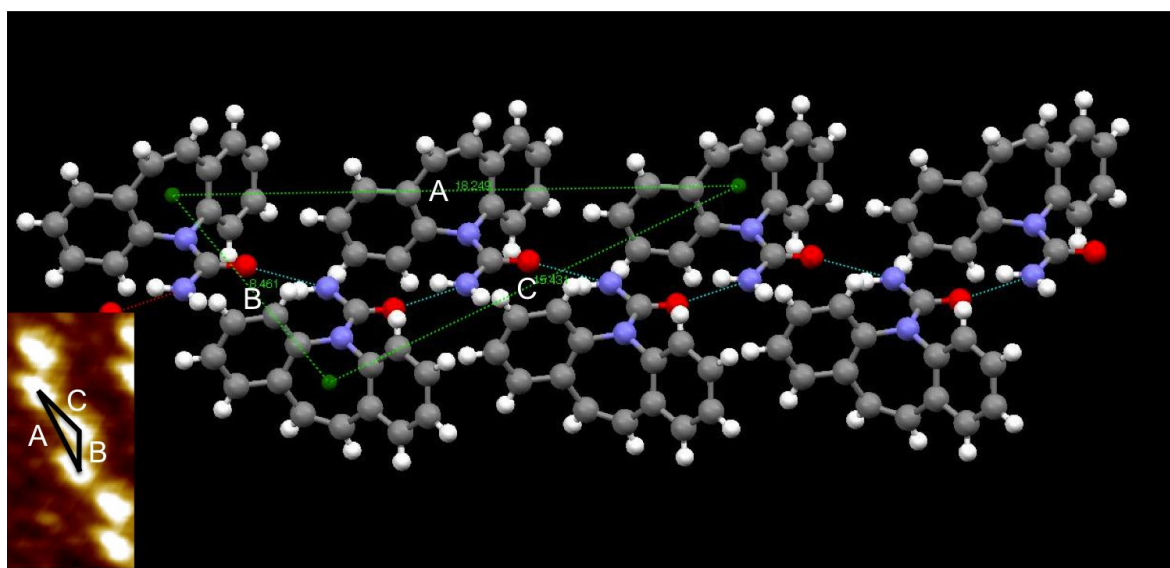

**Fig. S3** Crystallographic data of CBZ form V. Form V has three key dimensions (A (18.25 Å), B (8.46 Å) and C (15.43 Å)) which closely correlate with the three dimensions in the inset STM image (A (18.5 Å), B (8.50 Å) and C (13.0 Å)). For further information on CBZ form V please see Arlin *et al.*, *Chemical Communications*, 2011, **47**, 7074-7076.
